# Supplementary material
Source: MDPI journal article supplement (https://www.mdpi.com/2673-933X/3/2/12)
Supplement: s1 [file s1 › ruminants-2319398-supplementary.pdf]

## Supplementary Data

### *1. Samples collection and evaluation of environmental aspects*

The packed cell volume (PCV) value was determined using the microhematocrit method. The total white blood cell (TWBC) count and the platelet (PLT) count were determined on Giemsa-stained blood smears as previously described by Katsogiannou [24]. The white blood cell differential count and blood cell morphology including band and toxic neutrophils, reactive lymphocytes and activated monocytes was evaluated in the same blood smears. The fibrinogen concentration was calculated by a modified heat precipitation technique [25].

### *2 Laboratory results*

Complete blood count testing revealed in both animals, mild anemia and leukocytosis, mature neutrophilic count within reference interval but left shift and remarkable probably reactive thrombocytosis (Table S1). More over fibrinogen concentration was increased in both cases.

| Table S1. Hematological variables of the affected sheep |         |           |                    |
|---------------------------------------------------------|---------|-----------|--------------------|
|                                                         | Sheep 1 | Sheep 2   | Reference interval |
| PCV                                                     | 24      | 22        | 27.3–40.7          |
| WBC / $\mu$ l                                           | 16000   | 22000     | 6,100–14,200       |
| Neutrophils %                                           | 33      | 27        |                    |
| Neutrophils/ $\mu$ l                                    | 5440    | 5940      | 1,200-8,600        |
| Band neutrophils %                                      | 7       | 4         |                    |
| Band neutrophils/ $\mu$ l                               | 1120    | 880       | 0-100              |
| Lymphocytes %                                           | 57      | 62        |                    |
| Lymphocytes/ $\mu$ l                                    | 9120    | 13640     | 2,500-9,200        |
| Monocytes %                                             | 3       | 4         |                    |
| Monocytes/ $\mu$ l                                      | 480     | 880       | 0-1,000            |
| Eosinophils %                                           | 0       | 3         |                    |
| Eosinophils/ $\mu$ l                                    | 0       | 660       | 0-700              |
| Basophils %                                             | 0       | 0         |                    |
| Basophils/ $\mu$ l                                      | 0       |           | 0-60               |
| PLT cells/ $\mu$ l                                      | 980.000 | 1.220.000 | 240,000–820.000    |
| Fibrinogen (g/dL)                                       | 9.4     | 8.8       | 1-4                |

## References

24. Katsogiannou, E.G.; Athanasiou, L.V.; Katsoulos, P.D.; Polizopoulou, Z.S. Estimation of white blood cell and platelet counts in ovine blood smears and

comparison with the ADVIA 120 hematology analyzer. *Vet. Clin. Pathol.* **2020**, 49,222–226.

25. Millar, H.R.; Simpson J.G.; Stalker A.L. An evaluation of the heat precipitation method for plasma fibrinogen estimation. *J. Clin. Pathol.* **1971**, 24, 827-830.
